# Supplementary material
Source: PubMed Central journal article supplement (PMC4959097)
Supplement: supp_116.233312_SUPPLEMENTAL_233312.pdf [file supp_116.233312_SUPPLEMENTAL_233312.pdf]

Rondini EA, Duniec-Dmuchowski Z, Cukovic D, Dombkowski A, and Kocarek TA. Differential regulation of gene expression by cholesterol biosynthesis inhibitors that reduce (pravastatin) or enhance (squalestatin 1) nonsterol isoprenoid levels in primary cultured mouse and rat hepatocytes. *The Journal of Pharmacology and Experimental Therapeutics*.

**Supplemental Table 1. Mouse genes and primer pairs used for qRT-PCR.**

| <b>Gene Name</b> | <b>Gene Title</b>                                                  | <b>NCBI Reference Sequence</b> | <b>Forward Primer (5'→3')</b> | <b>Reverse Primer (5'→3')</b> |
|------------------|--------------------------------------------------------------------|--------------------------------|-------------------------------|-------------------------------|
| <i>Acaa2</i>     | acetyl-Coenzyme A acyltransferase 2                                | NM_177470                      | CCCTGCTACGAGGTGTGTTC          | ACATTGCCCACGATGACACT          |
| <i>Acot1</i>     | acyl-CoA thioesterase 1                                            | NM_012006                      | TTTGGAGGTTGGGGAAAGGT          | CCAGCCCTTGAATCAGCACTA         |
| <i>Acot2</i>     | acyl-CoA thioesterase 2                                            | NM_134188                      | AAGAAGCCGTGAACTACCTGC         | TGACTTGGTTTCTCAGAAGGGACA      |
| <i>Acot3</i>     | acyl-CoA thioesterase 3                                            | NM_134246                      | GCTCAGTCACCCCTCAGGTAA         | AAGTTTCCGCCGATGTTGGA          |
| <i>Acot4</i>     | acyl-CoA thioesterase 4                                            | NM_134247                      | TCCAAAGGTAAAAGGCCAG           | GCGGAATCATGGTCTGCTTG          |
| <i>Acox1</i>     | acyl-Coenzyme A oxidase 1, palmitoyl                               | NM_001271898                   | GGAACCTGTTGGCCTCAATTAC        | CTCGAAGATGAGTTCCGTGGC         |
| <i>Acs11</i>     | acyl-CoA synthetase long-chain family member 1                     | NM_007981                      | GCCGCGACTCCTTAAATAGCA         | ATGCAGAATTCTCCTCCGCTG         |
| <i>Aldh1a1</i>   | aldehyde dehydrogenase family 1, subfamily A1                      | NM_013467                      | TGACCAGGTGCTTTCCATTGTA        | TGCAGTCATTATGTGTGGTGAGT       |
| <i>Cpt1b</i>     | carnitine palmitoyltransferase 1b, muscle                          | NM_009948                      | TGTCTACCTCCGAAGCAGGA          | GCCATGACCGGCTTGATCT           |
| <i>Cpt2</i>      | carnitine palmitoyltransferase 2                                   | NM_009949                      | TGACAGCCAGTTCAGGAAGAC         | GGCCTGAGATGTAGCTGGTG          |
| <i>Cyp2b10</i>   | cytochrome P450, family 2, subfamily b, polypeptide 10             | NM_009999                      | GCTTTGAGTACACAGACCGT          | CTCAAACATCTGGCTGGAGA          |
| <i>Cyp4a10</i>   | cytochrome P450, family 4, subfamily a, polypeptide 10             | NM_010011                      | CTTCCCAAGTGCCTTTCCTAGAT       | GGCTGTCCATTCAACAAGAGC         |
| <i>Cyp51</i>     | cytochrome P450, family 51                                         | NM_020010                      | GTTTCAGGCGCAGGGATAGA          | CATCTGTTAGAGGACGCCCCG         |
| <i>Ehhadh</i>    | enoyl-Coenzyme A, hydratase/3-hydroxyacyl Coenzyme A dehydrogenase | NM_023737                      | GGTCAATGCCATCAGTCCAAC         | CTGGCTTCTGGTATCGCTGT          |

Rondini EA, Duniec-Dmuchowski Z, Cukovic D, Dombkowski A, and Kocarek TA. Differential regulation of gene expression by cholesterol biosynthesis inhibitors that reduce (pravastatin) or enhance (squalestatin 1) nonsterol isoprenoid levels in primary cultured mouse and rat hepatocytes. *The Journal of Pharmacology and Experimental Therapeutics*.

**Supplemental Table 1. Mouse genes and primer pairs used for qRT-PCR (continued).**

| Gene Name       | Gene Title                                                                                                                           | NCBI Reference Sequence | Forward Primer (5'→3') | Reverse Primer (5'→3') |
|-----------------|--------------------------------------------------------------------------------------------------------------------------------------|-------------------------|------------------------|------------------------|
| <i>Fabp1</i>    | fatty acid binding protein 1, liver                                                                                                  | NM_017399               | GTGGTCAGCTGTGGAAAGGA   | GTCCTCGGGCAGACCTATTG   |
| <i>Hadhb</i>    | hydroxyacyl-Coenzyme A dehydrogenase/3-ketoacyl-Coenzyme A thiolase/enoyl-Coenzyme A hydratase (trifunctional protein), beta subunit | NM_145558               | TTCGCGGACTCTAAGATTTCA  | GCAGAGTGCAGTTGGGAAGA   |
| <i>Hmgcr</i>    | 3-hydroxy-3-methylglutaryl-Coenzyme A reductase                                                                                      | NM_008255               | ATCCTGACGATAACGCGGTG   | AAGAGGCCAGCAATACCCAG   |
| <i>Hmgcs1</i>   | 3-hydroxy-3-methylglutaryl-Coenzyme A synthase 1                                                                                     | NM_145942               | TGATCCCCTTTGGTGGCTGA   | AGGGCAACGATTCCCACATC   |
| <i>Idi1</i>     | isopentenyl-diphosphate delta isomerase                                                                                              | NM_145360               | GACGTCAGGCTTGTGCTAGA   | CTAGAACACAGAGATTCCGGCT |
| <i>Lss</i>      | lanosterol synthase (2,3-oxidosqualene-lanosterol cyclase)                                                                           | NM_146006               | GGGCTGGTGATTATGGTGGT   | CTCGATGTGCAAGCCCCA     |
| <i>Mvd</i>      | mevalonate (diphospho) decarboxylase                                                                                                 | NM_138656               | CTGCACCAGGACCAGCTAAA   | CTGAGGCTGAGGGGTAGAGT   |
| <i>Pdk4</i>     | pyruvate dehydrogenase kinase, isoenzyme 4                                                                                           | NM_013743               | TAGGTGGGCGTCAGGATGAA   | TCTGAACCAAAGTCCAGCAG   |
| <i>Retsat</i>   | retinol saturase (all trans retinol 13,14 reductase)                                                                                 | NM_026159               | GAATGGTTCGAGGAGTGGCA   | CCAGTCACACTCTCCACCTTG  |
| <i>Slc25a20</i> | solute carrier family 25 (mitochondrial carnitine/acylcarnitine translocase), member 20                                              | NM_020520               | CATGTGCCTGGTGTGTTGTGG  | CCCTGTGATGCCCTCTCTCA   |
| <i>Slc25a34</i> | solute carrier family 25, member 34                                                                                                  | NM_001013780            | GGCCTCATGAATGGTGTCCG   | AGCTGTGTCTTGACCAGGTA   |

Rondini EA, Duniec-Dmuchowski Z, Cukovic D, Dombkowski A, and Kocarek TA. Differential regulation of gene expression by cholesterol biosynthesis inhibitors that reduce (pravastatin) or enhance (squalestatin 1) nonsterol isoprenoid levels in primary cultured mouse and rat hepatocytes. *The Journal of Pharmacology and Experimental Therapeutics*.

**Supplemental Table 2. Rat genes and primer pairs used for qRT-PCR.**

| <b>Gene Name</b> | <b>Gene Title</b>                                     | <b>NCBI Reference Sequence</b> | <b>Forward Primer (5'→3')</b> | <b>Reverse Primer (5'→3')</b> |
|------------------|-------------------------------------------------------|--------------------------------|-------------------------------|-------------------------------|
| <i>Acaa2</i>     | acetyl-CoA acyltransferase 2                          | NM_130433                      | GCTCCTCAGTTCCTGGCTGT          | CCACCTCGACGCCTTAACTC          |
| <i>Acot1</i>     | acyl-CoA thioesterase 1                               | NM_031315                      | ACCCTGAGGTAAAAGGACCA          | GGTTTCTCAGGATAGTCACAGGG       |
| <i>Acot2</i>     | acyl-CoA thioesterase 2                               | NM_138907                      | CCTGGTGGGTGCTAACATCA          | AGGGGGCACCTCCTAACTC           |
| <i>Acot3</i>     | acyl-CoA thioesterase 3                               | NM_001108041                   | ACCCTCAGGTAAAAGGTTTCAGG       | TGATTCGTTTGGTGCTCATGC         |
| <i>Acot4</i>     | acyl-CoA thioesterase 4                               | NM_001109440                   | CCCGAAGGTAAAAGGCCAG           | CCTGAGAAAGCCACCTTCGT          |
| <i>Acox1</i>     | acyl-CoA oxidase 1, palmitoyl                         | NM_017340                      | CGCCGTCGAGAAATTGAGAAC         | AGGCCAACAGGTTCCACAAA          |
| <i>Acs11</i>     | acyl-CoA synthetase long-chain family member 1        | NM_012820                      | AATGGCTGAGTGCATAGGCT          | GATGGTCACCCACTCAGGTC          |
| <i>Aldh1a1</i>   | aldehyde dehydrogenase 1 family, member A1            | NM_022407                      | GATGCCGACTTGGACATTGC          | TGGCTCGCTCAACACTCTTT          |
| <i>Cpt1b</i>     | carnitine palmitoyltransferase 1b, muscle             | NM_013200                      | ACGGATACGGGGTTTCCTAC          | GCAGGGCGTTCGTTTCT             |
| <i>Cpt2</i>      | carnitine palmitoyltransferase 2                      | NM_012930                      | ACAGCCAGTTCAGGAGAACA          | GGCCTGAGATGTAGCTGGTG          |
| <i>CYP2B1</i>    | cytochrome P450, family 2, subfamily b, polypeptide 1 | NM_001134844.1                 | CAACCCTTGATGACCGCAGTA         | TTCAGTGTTCTTGGGAAGCAG         |
| <i>CYP4A1</i>    | cytochrome P450, family 4, subfamily a, polypeptide 1 | NM_175837                      | CGCTTTGAGCTACTGCCAGA          | TCGGAGCTCCACAACGGAAT          |
| <i>Cyp51</i>     | cytochrome P450, family 51                            | NM_012941                      | GATGGAGCAGGTGACAGGAG          | ATATGGCGGACTTTTCGCTC          |
| <i>Ehhadh</i>    | enoyl-CoA, hydratase/3-hydroxyacyl CoA dehydrogenase  | NM_133606                      | CCCTGGCCTTGCATTAGGAA          | CGACACGAGCCTTTGCATTG          |

Rondini EA, Duniec-Dmuchowski Z, Cukovic D, Dombkowski A, and Kocarek TA. Differential regulation of gene expression by cholesterol biosynthesis inhibitors that reduce (pravastatin) or enhance (squalestatin 1) nonsterol isoprenoid levels in primary cultured mouse and rat hepatocytes. *The Journal of Pharmacology and Experimental Therapeutics*.

**Supplemental Table 2. Rat genes and primer pairs used for qRT-PCR (continued).**

| <b>Gene Name</b> | <b>Gene Title</b>                                                                                               | <b>NCBI Reference Sequence</b> | <b>Forward Primer (5'→3')</b> | <b>Reverse Primer (5'→3')</b> |
|------------------|-----------------------------------------------------------------------------------------------------------------|--------------------------------|-------------------------------|-------------------------------|
| <i>Fabp1</i>     | fatty acid binding protein 1, liver                                                                             | NM_012556                      | TTCATGAAGGCGATGGGTCT          | GTCTCCAGTTCGCACTCCTC          |
| <i>Hadhb</i>     | hydroxyacyl-CoA dehydrogenase/3-ketoacyl-CoA thiolase/enoyl-CoA hydratase (trifunctional protein), beta subunit | NM_133618                      | TATCTGGGGCGGATCACTCT          | CATAGCATGACCCTGTCTCCTCC       |
| <i>Hmgcr</i>     | 3-hydroxy-3-methylglutaryl-CoA reductase                                                                        | NM_013134                      | AGTGCAGAGAAAGGTGCGAA          | TGCGTCTCCATGAGGGTTTC          |
| <i>Hmgcs1</i>    | 3-hydroxy-3-methylglutaryl-CoA synthase 1                                                                       | NM_017268                      | TCGCGTTTGGTGCCTGAA            | AGGGCAACGATTCCCACATC          |
| <i>Idi1</i>      | isopentenyl-diphosphate delta isomerase 1                                                                       | NM_053539                      | GTGACGTCAGGACTACGCTA          | TCTGACCTAGAACACAGCGAT         |
| <i>Lss</i>       | lanosterol synthase (2,3-oxidosqualene-lanosterol cyclase)                                                      | NM_031049                      | CTGGCCTCAGGAGAACATCT          | CTCAAATGTGGCCAGCAAGG          |
| <i>Mvd</i>       | mevalonate (diphospho) decarboxylase                                                                            | NM_031062                      | CCAAGAGCAGGACTTCCAGG          | AATGTGTACGCCACCTTCGT          |
| <i>Pdk4</i>      | pyruvate dehydrogenase kinase, isozyme 4                                                                        | NM_053551                      | GCAGTCCTCACCAACCCTAC          | TCTGAACCGAAGTCCAGCAG          |
| <i>Retsat</i>    | retinol saturase (all trans retinol 13,14 reductase)                                                            | NM_145084                      | CGATTCCCAGACCGATCCAC          | CACCGACATAGAGGCTTCCC          |
| <i>Slc25a20</i>  | solute carrier family 25 (carnitine/acylcarnitine translocase), member 20                                       | NM_053965                      | GGGCAGCCACCTATGTACTC          | AGCTGCGGGTAGGTAAGTTC          |
| <i>Slc25a34</i>  | solute carrier family 25, member 34                                                                             | NM_001013936                   | GATCAACAGTGGTTTCTGGAGGA       | GCTGACGACATCGAAGGGAG          |
